# Supplementary material
Source: Springer Nature journal article supplement (https://www.springermedizin.de/resource/supplementary/12891_2009_670_MOESM1_ESM.pdf/9506520)
Supplement: MOESM1 [file 9506520]

Inclusion of Primary Care patients diagnosed with rotator cuff tendonitis and/or subacromial impingement syndrome (inclusion/exclusion criteria)

Diagnostic study of SIS and rotator cuff tendonitis. Study of correlation between:

- Positive provocation tests
- Existence of active MTrPs
- Diagnostic results obtained with MRI and ultrasonography.

Randomization

Protocolized treatment: joint repositioning, stabilization exercises, stretching

Protocolized treatment + MTrPs Dry Needling

Withdrawals

Withdrawals

End of treatment. Analysis of study variables

End of treatment. Analysis of study variables

Follow up assessment after 12 weeks
